# Supplementary material for: Agreement between Type 2 Diabetes Risk Scales in a Caucasian Population: A Systematic Review and Report
Source: PubMed Central journal article supplement (PMC7290893; doi:10.3390/jcm9051546), 2020-05-20
Supplement: jcm-09-01546-s001.pdf [file jcm-09-01546-s001.pdf]

**Supplementary material: Table S1.** Distribution of people at high risk using DETECT-2, DDRS, FINDRISC, EGATS, NUDS, Hisayama, ITD and ARIC score.

|                  | DETECT-2   |           | DDRS       |           | Cambridge  |           | FINDRISC   |           | EGATS      |           | NUDS       |           | Hisayama   |           | AUSDRISK   |           | ITD        |           | ARIC       |           |        |
|------------------|------------|-----------|------------|-----------|------------|-----------|------------|-----------|------------|-----------|------------|-----------|------------|-----------|------------|-----------|------------|-----------|------------|-----------|--------|
| <b>DETECT-2</b>  | <i>nHR</i> | <i>HR</i> | <i>nHR</i> | <i>HR</i> | <i>nHR</i> | <i>HR</i> | <i>nHR</i> | <i>HR</i> | <i>nHR</i> | <i>HR</i> | <i>nHR</i> | <i>HR</i> | <i>nHR</i> | <i>HR</i> | <i>nHR</i> | <i>HR</i> | <i>nHR</i> | <i>HR</i> | <i>nHR</i> | <i>HR</i> |        |
|                  | <i>nHR</i> | NA        | NA         | 47,443    | 3,227      | 45,344    | 5,308      | 45,780    | 4,920      | 40,569    | 10,101     | 30,720    | 19,967     | 39,602    | 11,038     | 42,396    | 8,245      | 50,195    | 483        | 50,340    | 360    |
|                  | <i>HR</i>  | NA        | NA         | 3,734     | 4,603      | 1,972     | 6,354      | 1,002     | 7,340      | 553       | 7,788      | 484       | 7,858      | 1,128     | 7,214      | 899       | 7,356      | 7,008     | 1,325      | 4,953     | 3,389  |
| <i>Kappa</i>     |            |           |            | 0.501     |            | 0.564     |            | 0.654     |            | 0.497     |            | 0.277     |            | 0.432     |            | 0.531     |            | 0.222     |            | 0.518     |        |
| <b>DDRS</b>      | <i>nHR</i> | <i>HR</i> | <i>nHR</i> | <i>HR</i> | <i>nHR</i> | <i>HR</i> | <i>nHR</i> | <i>HR</i> | <i>nHR</i> | <i>HR</i> | <i>nHR</i> | <i>HR</i> | <i>nHR</i> | <i>HR</i> | <i>nHR</i> | <i>HR</i> | <i>nHR</i> | <i>HR</i> | <i>nHR</i> | <i>HR</i> |        |
|                  | <i>nHR</i> | 47,443    | 3,734      | NA        | NA         | 46,235    | 4,880      | 44,910    | 6,267      | 40,603    | 10,543     | 31,198    | 19,977     | 38,787    | 12,345     | 41,384    | 9,742      | 50,845    | 326        | 49,507    | 1,670  |
|                  | <i>HR</i>  | 3,227     | 4,603      | NA        | NA         | 1,055     | 6,773      | 1,851     | 5,979      | 503       | 7,327      | 0         | 7,830      | 1,941     | 5,889      | 1,891     | 5,844      | 6,345     | 1,482      | 5,755     | 2,075  |
| <i>Kappa</i>     |            | 0.501     |            |           |            | 0.638     |            | 0.518     |            | 0.473     |            | 0.293     |            | 0.327     |            | 0.395     |            | 0.271     |            | 0.298     |        |
| <b>Cambridge</b> | <i>nHR</i> | <i>HR</i> | <i>nHR</i> | <i>HR</i> | <i>nHR</i> | <i>HR</i> | <i>nHR</i> | <i>HR</i> | <i>nHR</i> | <i>HR</i> | <i>nHR</i> | <i>HR</i> | <i>nHR</i> | <i>HR</i> | <i>nHR</i> | <i>HR</i> | <i>nHR</i> | <i>HR</i> | <i>nHR</i> | <i>HR</i> |        |
|                  | <i>nHR</i> | 45,344    | 1,972      | 46,235    | 1,055      | NA        | NA         | 42,789    | 4,517      | 40,085    | 7,201      | 30,914    | 16,389     | 38,799    | 8,457      | 40,276    | 6,991      | 47,041    | 257        | 46,354    | 8,881  |
|                  | <i>HR</i>  | 5,308     | 6,354      | 4,880     | 6,773      | NA        | NA         | 3,961     | 7,701      | 1,036     | 10,625     | 290       | 11,372     | 1,931     | 9,731      | 3,001     | 8,565      | 10,104    | 1,545      | 962       | 2,781  |
| <i>Kappa</i>     |            | 0.564     |            | 0.638     |            |           |            | 0.555     |            | 0.633     |            | 0.414     |            | 0.541     |            | 0.524     |            | 0.187     |            | 0.293     |        |
| <b>FINDRISC</b>  | <i>nHR</i> | <i>HR</i> | <i>nHR</i> | <i>HR</i> | <i>nHR</i> | <i>HR</i> | <i>nHR</i> | <i>HR</i> | <i>nHR</i> | <i>HR</i> | <i>nHR</i> | <i>HR</i> | <i>nHR</i> | <i>HR</i> | <i>nHR</i> | <i>HR</i> | <i>nHR</i> | <i>HR</i> | <i>nHR</i> | <i>HR</i> |        |
|                  | <i>nHR</i> | 45,780    | 1,002      | 44,910    | 1,851      | 42,789    | 3,961      | NA        | NA         | 40,122    | 6,630      | 30,409    | 16,363     | 37,772    | 8,956      | 41,231    | 5,497      | 46,614    | 152        | 46,397    | 385    |
|                  | <i>HR</i>  | 4,920     | 7,340      | 6,267     | 5,979      | 4,527     | 7,701      | NA        | NA         | 1,000     | 11,259     | 795       | 11,462     | 2,958     | 9,296      | 2,064     | 10,104     | 10,589    | 1,656      | 8,896     | 3,364  |
| <i>Kappa</i>     |            | 0.654     |            | 0.518     |            | 0.555     |            |           |            | 0.664     |            | 0.399     |            | 0.480     |            | 0.645     |            | 0.193     |            | 0.358     |        |
| <b>EGATS</b>     | <i>nHR</i> | <i>HR</i> | <i>nHR</i> | <i>HR</i> | <i>nHR</i> | <i>HR</i> | <i>nHR</i> | <i>HR</i> | <i>nHR</i> | <i>HR</i> | <i>nHR</i> | <i>HR</i> | <i>nHR</i> | <i>HR</i> | <i>nHR</i> | <i>HR</i> | <i>nHR</i> | <i>HR</i> | <i>nHR</i> | <i>HR</i> |        |
|                  | <i>nHR</i> | 40,569    | 553        | 40,603    | 503        | 40,085    | 1,036      | 40,122    | 1,000      | NA        | NA         | 29,827    | 11,286     | 36,170    | 4,895      | 38,733    | 2,351      | 40,974    | 138        | 40,919    | 203    |
|                  | <i>HR</i>  | 10,101    | 7,788      | 10,543    | 7,327      | 7,201     | 10,625     | 6,630     | 11,259     | NA        | NA         | 1,353     | 16,532     | 40,701    | 18,250     | 4,532     | 13,249     | 16,198    | 1,670      | 14,343    | 3,546  |
| <i>Kappa</i>     |            | 0.497     |            | 0.473     |            | 0.633     |            | 0.664     |            |           |            | 0.562     |            | 0.624     |            | 0.713     |            | 0.121     |            | 0.249     |        |
| <b>NUDS</b>      | <i>nHR</i> | <i>HR</i> | <i>nHR</i> | <i>HR</i> | <i>nHR</i> | <i>HR</i> | <i>nHR</i> | <i>HR</i> | <i>nHR</i> | <i>HR</i> | <i>nHR</i> | <i>HR</i> | <i>nHR</i> | <i>HR</i> | <i>nHR</i> | <i>HR</i> | <i>nHR</i> | <i>HR</i> | <i>nHR</i> | <i>HR</i> |        |
|                  | <i>nHR</i> | 30,720    | 484        | 31,198    | 0          | 30,914    | 290        | 30,409    | 795        | 29,827    | 1,353      | NA        | NA         | 29,307    | 1,855      | 29,278    | 1,911      | 31,183    | 16         | 30,946    | 24,334 |

|                 |     |        |       |        |       |        |        |        |        |        |        |        |        |        |        |        |        |        |       |        |       |    |
|-----------------|-----|--------|-------|--------|-------|--------|--------|--------|--------|--------|--------|--------|--------|--------|--------|--------|--------|--------|-------|--------|-------|----|
|                 | HR  | 19,967 | 7,858 | 19,977 | 7,830 | 16,389 | 11,372 | 16,363 | 11,462 | 11,286 | 16,532 | NA     | NA     | 11,422 | 16,396 | 14,004 | 13,690 | 26,007 | 1,792 | 258    | 3,491 |    |
| <i>Kappa</i>    |     | 0.277  |       | 0.293  |       | 0.414  |        | 0.399  |        | 0.562  |        | 0.540  |        | 0.444  |        | 0.067  |        | 0.123  |       |        |       |    |
| <b>Hisayama</b> | nHR | HR     | nHR   | HR     | nHR   | HR     | nHR    | HR     | nHR    | HR     | nHR    | HR     | nHR    | HR     | nHR    | HR     | nHR    | HR     | nHR   | HR     | nHR   | HR |
|                 | nHR | 39,602 | 1,128 | 38,787 | 1,941 | 38,799 | 1,931  | 37,772 | 2,958  | 36,170 | 4,531  | 29,307 | 11,422 | NA     | NA     | 38,579 | 2,063  | 40,515 | 209   | 40,505 | 225   |    |
|                 | HR  | 11,038 | 7,214 | 12,345 | 5,889 | 8,457  | 9,731  | 8,956  | 9,296  | 4,895  | 13,355 | 1,855  | 16,396 | NA     | NA     | 4,656  | 13,538 | 16,630 | 1,599 | 14,728 | 3,524 |    |
| <i>Kappa</i>    |     | 0.432  |       | 0.327  |       | 0.541  |        | 0.480  |        | 0.624  |        | 0.540  |        | 0.722  |        | 0.110  |        | 0.240  |       |        |       |    |
| <b>AUSDRISK</b> | nHR | HR     | nHR   | HR     | nHR   | HR     | nHR    | HR     | nHR    | HR     | nHR    | HR     | nHR    | HR     | nHR    | HR     | nHR    | HR     | nHR   | HR     | nHR   | HR |
|                 | nHR | 42,396 | 899   | 41,384 | 1,891 | 40,276 | 3,001  | 41,231 | 2,064  | 38,733 | 4,532  | 29,278 | 14,004 | 38,579 | 4,656  | NA     | NA     | 43,067 | 216   | 43,290 | 5     |    |
|                 | HR  | 8,245  | 7,356 | 9,742  | 5,844 | 6,991  | 8,565  | 5,497  | 10,104 | 2,351  | 13,249 | 1,911  | 13,690 | 2,063  | 13,538 | NA     | NA     | 14,016 | 1,566 | 11,869 | 3,732 |    |
| <i>Kappa</i>    |     | 0.531  |       | 0.395  |       | 0.524  |        | 0.645  |        | 0.713  |        | 0.444  |        | 0.722  |        | 0.133  |        | 0.316  |       |        |       |    |
| <b>ITD</b>      | nHR | HR     | nHR   | HR     | nHR   | HR     | nHR    | HR     | nHR    | HR     | nHR    | HR     | nHR    | HR     | nHR    | HR     | nHR    | HR     | nHR   | HR     | nHR   | HR |
|                 | nHR | 50,195 | 7,008 | 50,845 | 6,345 | 47,041 | 10,104 | 46,614 | 10,589 | 40,974 | 16,198 | 31,183 | 26,007 | 40,515 | 16,630 | 43,067 | 14,016 | NA     | NA    | 54,321 | 2,882 |    |
|                 | HR  | 483    | 1,325 | 326    | 1,482 | 257    | 1,545  | 152    | 1,656  | 138    | 1,670  | 16     | 1,792  | 209    | 1,599  | 216    | 1,566  | NA     | NA    | 945    | 863   |    |
| <i>Kappa</i>    |     | 0.222  |       | 0.271  |       | 0.187  |        | 0.193  |        | 0.121  |        | 0.067  |        | 0.110  |        | 0.133  |        | 0.281  |       |        |       |    |
| <b>ARIC</b>     | nHR | HR     | nHR   | HR     | nHR   | HR     | nHR    | HR     | nHR    | HR     | nHR    | HR     | nHR    | HR     | nHR    | HR     | nHR    | HR     | nHR   | HR     | nHR   | HR |
|                 | nHR | 50,340 | 4,953 | 49,507 | 5,755 | 46,354 | 8,881  | 46,397 | 8,896  | 40,919 | 14,343 | 30,946 | 24,334 | 40,505 | 14,728 | 43,290 | 11,869 | 54,321 | 945   | NA     | NA    |    |
|                 | HR  | 360    | 3,389 | 1,670  | 2,075 | 962    | 2,781  | 385    | 3,364  | 203    | 346    | 258    | 3,491  | 225    | 3,524  | 5      | 3,732  | 2,882  | 863   | NA     | NA    |    |
| <i>Kappa</i>    |     | 0.518  |       | 0.298  |       | 0.293  |        | 0.358  |        | 0.249  |        | 0.123  |        | 0.240  |        | 0.316  |        | 0.281  |       |        |       |    |

DETECT-2: Diabetes and Impaired Glucose Tolerance; DDRS: Danish diabetes Risk score; Cambridge: Cambridge Risk Score; FIDRISC: FINnish Diabetes RiSk SCore risk; EGATS: Electric Generating Authority of Thailand Study; NUDS, National Urban Diabetes Survey; Hisayama: Hisayama study; AUSDRISK: AUStralian Type 2 Diabetes RiSk; ITD: Instrument for type 2 diabetes; ARIC: Atherosclerosis Risk in Communities. NA: Non-Applicable; HR: high risk; nHR: non-high ris
